# Supplementary material for: Intra-Gene DNA Methylation Variability Is a Clinically Independent Prognostic Marker in Women’s Cancers
Source: PubMed Central journal article supplement (PMC4667934; doi:10.1371/journal.pone.0143178), 2015-12-02

Mean gene body  $\beta$

0.3 0.4 0.5 0.6 0.7

Cluster  
hyper 1

Cluster  
hyper 2

Cluster  
hypo 1

Cluster  
hypo 2

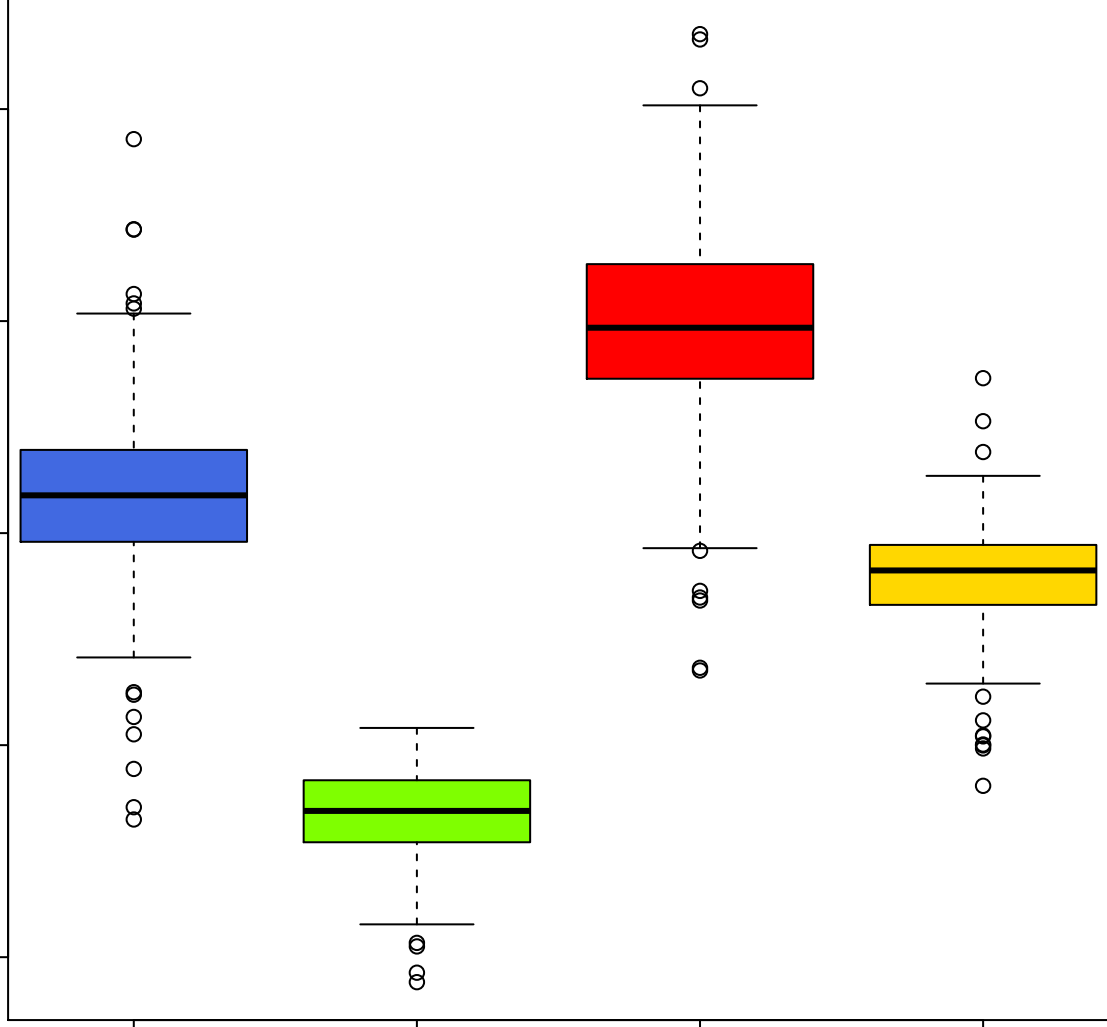

Supplement: pone.0143178.s002.pdf [file pone.0143178.s002.pdf]
