# Supplementary material for: Intra-Gene DNA Methylation Variability Is a Clinically Independent Prognostic Marker in Women’s Cancers
Source: PubMed Central journal article supplement (PMC4667934; doi:10.1371/journal.pone.0143178), 2015-12-02
Supplement: pone.0143178.s003.pdf [file pone.0143178.s003.pdf]

## **Supplementary Information: Intra-gene DNA methylation variability is a technically and clinically independent prognostic marker in women's cancers**

Thomas E. Bartlett, Allison Jones, Ellen L. Goode, Brooke L. Fridley, Julie M Cunningham, Els M. J. J. Berns, Elisabeth Wik, Helga B. Salvesen, Ben Davidson, Claes G. Trope, Sandrina Lambrechts, Ignace Vergote and Martin Widschwendter

| Gene         | No. models sig. out of 8281 | p-val | q-val | Chr | Gene info                                                                                                        |
|--------------|-----------------------------|-------|-------|-----|------------------------------------------------------------------------------------------------------------------|
| SEMA4A       | 8274                        | 0     | 0     | 1   | sema domain, immunoglobulin domain (Ig), transmembrane domain (TM) and short cytoplasmic domain, (semaphorin) 4A |
| PYCARD       | 8196                        | 0     | 0     | 16  | PYD and CARD domain containing                                                                                   |
| RNF122       | 8129                        | 0     | 0     | 8   | ring finger protein 122                                                                                          |
| ALPL         | 8127                        | 0     | 0     | 1   | alkaline phosphatase, liver/bone/kidney                                                                          |
| RIC3         | 8108                        | 0     | 0     | 11  | resistance to inhibitors of cholinesterase 3 homolog (C. elegans)                                                |
| CXXC4        | 8075                        | 0     | 0     | 4   | CXXC finger protein 4                                                                                            |
| RSPH9        | 7945                        | 0     | 0     | 6   | radial spoke head 9 homolog (Chlamydomonas)                                                                      |
| TMEM17       | 7877                        | 0     | 0     | 2   | transmembrane protein 17                                                                                         |
| PCTP         | 7869                        | 0     | 0     | 17  | phosphatidylcholine transfer protein                                                                             |
| UBAP2L       | 7837                        | 0     | 0     | 1   | ubiquitin associated protein 2-like                                                                              |
| PLDN         | 7652                        | 0     | 0     | 15  | biogenesis of lysosomal organelles complex-1, subunit 6, pallidin                                                |
| ZNF727       | 7626                        | 0     | 0     | 7   | zinc finger protein 727                                                                                          |
| NRL          | 7583                        | 0     | 0     | 14  | neural retina leucine zipper                                                                                     |
| OBFC1        | 7488                        | 0     | 0     | 10  | oligonucleotide/oligosaccharide-binding fold containing 1                                                        |
| SERHL2       | 7245                        | 0     | 0     | 22  | serine hydrolase-like 2                                                                                          |
| FOXR1        | 7220                        | 0     | 0     | 11  | forkhead box R1                                                                                                  |
| PROSC        | 7218                        | 0     | 0     | 8   | proline synthetase co-transcribed homolog (bacterial)                                                            |
| SLC50A1      | 7207                        | 0     | 0     | 1   | solute carrier family 50 (sugar transporter), member 1                                                           |
| PDE1B        | 7143                        | 0     | 0     | 12  | phosphodiesterase 1B, calmodulin-dependent                                                                       |
| MEX3B        | 7109                        | 0     | 0     | 15  | mex-3 homolog B (C. elegans)                                                                                     |
| NOVA1        | 7003                        | 0     | 0     | 14  | neuro-oncological ventral antigen 1                                                                              |
| EIF2C4       | 7002                        | 0     | 0     | 1   | argonate RISC catalytic component 4                                                                              |
| BK250D10     | 6945                        | 0     | 0     |     |                                                                                                                  |
| SPATA13      | 6857                        | 0     | 0     | 13  | spermatogenesis associated 13                                                                                    |
| C14orf64     | 6854                        | 0     | 0     | 14  | chromosome 14 open reading frame 64                                                                              |
| ACRBP        | 6849                        | 0     | 0     | 12  | acrosin binding protein                                                                                          |
| CLRN3        | 6846                        | 0     | 0     | 10  | clarin 3                                                                                                         |
| ARL10        | 6839                        | 0     | 0     | 5   | ADP-ribosylation factor-like 10                                                                                  |
| PITHD1       | 6828                        | 0     | 0     | 1   | PITH (C-terminal proteasome-interacting domain of thioredoxin-like) domain containing 1                          |
| CGN          | 6761                        | 0     | 0     | 1   | cingulin                                                                                                         |
| SEC14L4      | 6746                        | 0     | 0     | 22  | SEC14-like 4 (S. cerevisiae)                                                                                     |
| HOXB9        | 6742                        | 0     | 0     | 17  | homeobox B9                                                                                                      |
| SEC14L2      | 6700                        | 0     | 0     | 22  | SEC14-like 2 (S. cerevisiae)                                                                                     |
| ANKRD13B     | 6681                        | 0     | 0     | 17  | ankyrin repeat domain 13B                                                                                        |
| NINL         | 6672                        | 0     | 0     | 20  | ninein-like                                                                                                      |
| COMMD6       | 6641                        | 0     | 0     | 13  | COMM domain containing 6                                                                                         |
| TBC1D20      | 6589                        | 0     | 0     | 20  | TBC1 domain family, member 20                                                                                    |
| IL17REL      | 6573                        | 0     | 0     | 22  | interleukin 17 receptor E-like                                                                                   |
| ENG          | 6572                        | 0     | 0     | 9   | endoglin                                                                                                         |
| GPC5         | 6557                        | 0     | 0     | 13  | glypican 5                                                                                                       |
| SAMD10       | 6483                        | 0     | 0     | 20  | sterile alpha motif domain containing 10                                                                         |
| SRC          | 6482                        | 0     | 0     | 20  | v-src sarcoma (Schmidt-Ruppin A-2) viral oncogene homolog (avian)                                                |
| EGR3         | 6481                        | 0     | 0     | 8   | early growth response 3                                                                                          |
| FAM26F       | 6436                        | 0     | 0     | 6   | family with sequence similarity 26, member F                                                                     |
| TMEM185B     | 6338                        | 0     | 0     | 2   | transmembrane protein 185B                                                                                       |
| SYBU         | 6326                        | 0     | 0     | 8   | syntabulin (syntaxin-interacting)                                                                                |
| C14orf126    | 6316                        | 0     | 0     | 14  | D-tyrosyl-tRNA deacylase 2 (putative)                                                                            |
| WDR65        | 6307                        | 0     | 0     | 1   | WD repeat domain 65                                                                                              |
| RPF2         | 6286                        | 0     | 0     | 6   | ribosome production factor 2 homolog (S. cerevisiae)                                                             |
| SNRNP27      | 6277                        | 0     | 0     | 2   | small nuclear ribonucleoprotein 27kDa (U4/U6.U5)                                                                 |
| ATG4D        | 6213                        | 0     | 0     | 19  | autophagy related 4D, cysteine peptidase                                                                         |
| ABCB6        | 6158                        | 0     | 0     | 2   | ATP-binding cassette, sub-family B (MDR/TAP), member 6                                                           |
| IFNGR1       | 6133                        | 0     | 0     | 6   | interferon gamma receptor 1                                                                                      |
| SLC27A6      | 6132                        | 0     | 0     | 5   | solute carrier family 27 (fatty acid transporter), member 6                                                      |
| TLE4         | 6111                        | 0     | 0     | 9   | transducin-like enhancer of split 4 (E(sp)1) homolog, Drosophila                                                 |
| TCL6         | 6078                        | 0     | 0     | 14  | T-cell leukemia/lymphoma 6 (non-protein coding)                                                                  |
| ECEL1P2      | 6047                        | 0     | 0     | 2   | endothelin converting enzyme-like 1, pseudogene 2                                                                |
| LOC100134259 | 6006                        | 0     | 0     | 2   | uncharacterized LOC100134259                                                                                     |
| ZNF300P1     | 5956                        | 0     | 0     | 5   | zinc finger protein 300 pseudogene 1                                                                             |
| SP5          | 5944                        | 0     | 0     | 2   | Sp5 transcription factor                                                                                         |
| ICOSLG       | 5928                        | 0     | 0     | 21  | inducible T-cell co-stimulator ligand                                                                            |
| CENPW        | 5699                        | 0     | 0     | 6   | centromere protein W                                                                                             |
| GAMT         | 5692                        | 0     | 0     | 19  | guanidinoacetate N-methyltransferase                                                                             |
| IQCG         | 5655                        | 0     | 0     | 3   | IQ motif containing G                                                                                            |
| PIK3R3       | 5641                        | 0     | 0     | 1   | phosphoinositide-3-kinase, regulatory subunit 3 (gamma)                                                          |
| EGR2         | 5631                        | 0     | 0     | 10  | early growth response 2                                                                                          |
| GRASP        | 5628                        | 0     | 0     | 12  | GRP1 (general receptor for phosphoinositides 1)-associated scaffold protein                                      |
| LOC391322    | 5608                        | 0     | 0     | 22  | D-dopachrome tautomerase-like                                                                                    |
| HRASLS5      | 5577                        | 0     | 0     | 11  | HRAS-like suppressor family, member 5                                                                            |
| GPNMB        | 5576                        | 0     | 0     | 7   | glycoprotein (transmembrane) nmb                                                                                 |
| B4GALNT1     | 5542                        | 0     | 0     | 12  | beta-1,4-N-acetyl-galactosaminyl transferase 1                                                                   |
| TCFL5        | 5518                        | 0     | 0     | 20  | transcription factor-like 5 (basic helix-loop-helix)                                                             |
| C1orf173     | 5501                        | 0     | 0     | 1   | chromosome 1 open reading frame 173                                                                              |
| NOX4         | 5468                        | 0     | 0     | 11  | NADPH oxidase 4                                                                                                  |
| ZBTB10       | 5461                        | 0     | 0     | 8   | zinc finger and BTB domain containing 10                                                                         |
| VSTM5        | 5431                        | 0     | 0     | 11  | V-set and transmembrane domain containing 5                                                                      |
| RPS7         | 5403                        | 0     | 0     | 2   | ribosomal protein S7                                                                                             |
| COL17A1      | 5360                        | 0     | 0     | 10  | collagen, type XVII, alpha 1                                                                                     |
| ZNF346       | 5324                        | 0     | 0     | 5   | zinc finger protein 346                                                                                          |
| CHSY3        | 5308                        | 0     | 0     | 5   | chondroitin sulfate synthase 3                                                                                   |
| ARMC7        | 5287                        | 0     | 0     | 17  | armadillo repeat containing 7                                                                                    |
| ARSA         | 5238                        | 0     | 0     | 22  | arylsulfatase A                                                                                                  |
| PLA2G16      | 5232                        | 0     | 0     | 11  | phospholipase A2, group XVI                                                                                      |
| CD74         | 5226                        | 0     | 0     | 5   | CD74 molecule, major histocompatibility complex, class II invariant chain                                        |
| GCM2         | 5202                        | 0     | 0     | 6   | glial cells missing homolog 2 (Drosophila)                                                                       |
| HNRNPA3      | 5201                        | 0     | 0     | 2   | heterogeneous nuclear ribonucleoprotein A3                                                                       |
| LGALS9       | 5154                        | 0     | 0     | 17  | lectin, galactoside-binding, soluble, 9                                                                          |
| KCNJ9        | 5135                        | 0     | 0     | 1   | potassium inwardly-rectifying channel, subfamily J, member 9                                                     |
| MYO11        | 5095                        | 0     | 0     | 18  | myomesin 1                                                                                                       |
| NAA40        | 5082                        | 0     | 0     | 11  | N(alpha)-acetyltransferase 40, NatD catalytic subunit, homolog (S. cerevisiae)                                   |
| MS4A15       | 5073                        | 0     | 0     | 11  | membrane-spanning 4-domains, subfamily A, member 15                                                              |
| SERHL        | 5069                        | 0     | 0     | 22  | serine hydrolase-like                                                                                            |
| SYT14        | 5036                        | 0     | 0     | 1   | synaptotagmin XIV                                                                                                |
| MYO3A        | 5005                        | 0     | 0     | 10  | myosin IIIA                                                                                                      |
| SLC22A20     | 4997                        | 0     | 0     | 11  | solute carrier family 22, member 20                                                                              |
| XRCC2        | 4953                        | 0     | 0     | 7   | X-ray repair complementing defective repair in Chinese hamster cells 2                                           |
| PLK2         | 4942                        | 0     | 0     | 5   | polo-like kinase 2                                                                                               |
| TOP11        | 4902                        | 0     | 0     | 6   | t-complex 11, testis-specific                                                                                    |
| TFPI2        | 4885                        | 0     | 0     | 7   | tissue factor pathway inhibitor 2                                                                                |
| GOLPH3       | 4864                        | 0     | 0     | 5   | golgi phosphoprotein 3 (coat-protein)                                                                            |

Supplementary Table 1: Ovarian cancer prognostic signature - top 100 genes.

Significance is assigned to genes according to the frequency with which they appear in model fits which are significantly predictive of patient outcome (survival, adjusted for clinical covariates). Gene body DNA methylation variance was used as a per-gene measure for the model fits.

|    | Symbol           | Rank in prog. sig. | q-val    | Chr | Info                                                                                                             |
|----|------------------|--------------------|----------|-----|------------------------------------------------------------------------------------------------------------------|
| 1  | <i>SEMA4A</i>    | 1                  | 0        | 1   | sema domain, immunoglobulin domain (Ig), transmembrane domain (TM) and short cytoplasmic domain, (semaphorin) 4A |
| 2  | <i>RSPH9</i>     | 7                  | 0        | 6   | radial spoke head 9 homolog (Chlamydomonas)                                                                      |
| 3  | <i>C14orf64</i>  | 25                 | 0        | 14  | chromosome 14 open reading frame 64                                                                              |
| 4  | <i>SRC</i>       | 42                 | 0        | 20  | v-src sarcoma (Schmidt-Ruppin A-2) viral oncogene homolog (avian)                                                |
| 5  | <i>C1orf173</i>  | 73                 | 0        | 1   | chromosome 1 open reading frame 173                                                                              |
| 6  | <i>CHSY3</i>     | 80                 | 0        | 5   | chondroitin sulfate synthase 3                                                                                   |
| 7  | <i>MYO3A</i>     | 94                 | 0        | 10  | myosin IIIA                                                                                                      |
| 8  | <i>PLK2</i>      | 97                 | 0        | 5   | polo-like kinase 2                                                                                               |
| 9  | <i>GPR137B</i>   | 127                | 0        | 1   | G protein-coupled receptor 137B                                                                                  |
| 10 | <i>ABCA8</i>     | 137                | 0        | 17  | ATP-binding cassette, sub-family A (ABC1), member 8                                                              |
| 11 | <i>HERC5</i>     | 141                | 0        | 4   | HECT and RLD domain containing E3 ubiquitin protein ligase 5                                                     |
| 12 | <i>TMEM101</i>   | 154                | 0        | 17  | transmembrane protein 101                                                                                        |
| 13 | <i>FAM162B</i>   | 158                | 0        | 6   | family with sequence similarity 162, member B                                                                    |
| 14 | <i>KANK1</i>     | 161                | 0        | 9   | KN motif and ankyrin repeat domains 1                                                                            |
| 15 | <i>TUBB2B</i>    | 176                | 0        | 6   | tubulin, beta 2B class IIb                                                                                       |
| 16 | <i>PLK1</i>      | 191                | 0        | 16  | polo-like kinase 1                                                                                               |
| 17 | <i>LHCGR</i>     | 194                | 0        | 2   | luteinizing hormone/choriogonadotropin receptor                                                                  |
| 18 | <i>C1QL3</i>     | 225                | 0        | 10  | complement component 1, q subcomponent-like 3                                                                    |
| 19 | <i>RHPN2</i>     | 240                | 0        | 19  | rhophilin, Rho GTPase binding protein 2                                                                          |
| 20 | <i>PARP15</i>    | 298                | 1.1e-166 | 3   | poly (ADP-ribose) polymerase family, member 15                                                                   |
| 21 | <i>IRF4</i>      | 307                | 3.9e-152 | 6   | interferon regulatory factor 4                                                                                   |
| 22 | <i>COL6A5</i>    | 326                | 7.1e-124 | 3   | collagen, type VI, alpha 5                                                                                       |
| 23 | <i>KBTBD8</i>    | 335                | 1.4e-115 | 3   | kelch repeat and BTB (POZ) domain containing 8                                                                   |
| 24 | <i>MLF1</i>      | 345                | 6.8e-103 | 3   | myeloid leukemia factor 1                                                                                        |
| 25 | <i>PTH2R</i>     | 359                | 3.6e-81  | 2   | parathyroid hormone 2 receptor                                                                                   |
| 26 | <i>ACHE</i>      | 364                | 2e-74    | 7   | acetylcholinesterase                                                                                             |
| 27 | <i>C6orf97</i>   | 379                | 1.3e-58  | 6   | coiled-coil domain containing 170                                                                                |
| 28 | <i>GRB14</i>     | 390                | 1.3e-47  | 2   | growth factor receptor-bound protein 14                                                                          |
| 29 | <i>NPR3</i>      | 416                | 8.2e-34  | 5   | natriuretic peptide receptor C/guanylate cyclase C (atrionatriuretic peptide receptor C)                         |
| 30 | <i>C20orf194</i> | 438                | 2.5e-24  | 20  | chromosome 20 open reading frame 194                                                                             |
| 31 | <i>NID2</i>      | 446                | 2.4e-21  | 14  | nidogen 2 (osteonidogen)                                                                                         |
| 32 | <i>KCNMB4</i>    | 471                | 5.1e-11  | 12  | potassium large conductance calcium-activated channel, subfamily M, beta member 4                                |
| 33 | <i>B3GNT9</i>    | 476                | 1.7e-10  | 16  | UDP-GlcNAc:betaGal beta-1,3-N-acetylglucosaminyltransferase 9                                                    |
| 34 | <i>NPTX1</i>     | 483                | 3.1e-09  | 17  | neuronal pentraxin I                                                                                             |
| 35 | <i>SHISA9</i>    | 499                | 1.6e-06  | 16  | shisa homolog 9 (Xenopus laevis)                                                                                 |
| 36 | <i>ASIP</i>      | 509                | 1.7e-05  | 20  | agouti signaling protein                                                                                         |
| 37 | <i>CCND2</i>     | 519                | 0.00011  | 12  | cyclin D2                                                                                                        |
| 38 | <i>SNX18</i>     | 524                | 0.00021  | 5   | sorting nexin 18                                                                                                 |
| 39 | <i>CPA2</i>      | 529                | 4e-04    | 7   | carboxypeptidase A2 (pancreatic)                                                                                 |
| 40 | <i>PRR25</i>     | 533                | 0.00047  | 16  | proline rich 25                                                                                                  |
| 41 | <i>DUSP27</i>    | 535                | 5e-04    | 1   | dual specificity phosphatase 27 (putative)                                                                       |
| 42 | <i>CD302</i>     | 546                | 0.00087  | 2   | CD302 molecule                                                                                                   |
| 43 | <i>SLC12A8</i>   | 549                | 0.001    | 3   | solute carrier family 12 (potassium/chloride transporters), member 8                                             |
| 44 | <i>PHACTR3</i>   | 553                | 0.0011   | 20  | phosphatase and actin regulator 3                                                                                |
| 45 | <i>OTX2</i>      | 569                | 0.0026   | 14  | orthodenticle homeobox 2                                                                                         |
| 46 | <i>CAV2</i>      | 573                | 0.0035   | 7   | caveolin 2                                                                                                       |
| 47 | <i>PALM3</i>     | 577                | 0.004    | 19  | paralemmin 3                                                                                                     |
| 48 | <i>SEZ6L2</i>    | 578                | 0.0042   | 16  | seizure related 6 homolog (mouse)-like 2                                                                         |
| 49 | <i>SUN3</i>      | 601                | 0.01     | 7   | Sad1 and UNC84 domain containing 3                                                                               |
| 50 | <i>EPHA6</i>     | 612                | 0.013    | 3   | EPH receptor A6                                                                                                  |
| 51 | <i>HLA-F-AS1</i> | 628                | 0.018    | 6   | HLA-F antisense RNA 1                                                                                            |
| 52 | <i>ALDH1A2</i>   | 629                | 0.019    | 15  | aldehyde dehydrogenase 1 family, member A2                                                                       |
| 53 | <i>TRPC1</i>     | 637                | 0.022    | 3   | transient receptor potential cation channel, subfamily C, member 1                                               |
| 54 | <i>TSHZ3</i>     | 646                | 0.029    | 19  | teashirt zinc finger homeobox 3                                                                                  |
| 55 | <i>ITGA4</i>     | 648                | 0.031    | 2   | integrin, alpha 4 (antigen CD49D, alpha 4 subunit of VLA-4 receptor)                                             |
| 56 | <i>NEGR1</i>     | 653                | 0.033    | 1   | neuronal growth regulator 1                                                                                      |

Supplementary Table 2: Prognostic signature, cluster 'hyper 1'

|    | Symbol       | Rank in prog. sig. | q-val    | Chr | Info                                                                             |
|----|--------------|--------------------|----------|-----|----------------------------------------------------------------------------------|
| 1  | RNF122       | 3                  | 0        | 8   | ring finger protein 122                                                          |
| 2  | PLDN         | 11                 | 0        | 15  | biogenesis of lysosomal organelles complex-1, subunit 6, pallidin                |
| 3  | EIF2C4       | 22                 | 0        | 1   | argonaute RISC catalytic component 4                                             |
| 4  | TBC1D20      | 37                 | 0        | 20  | TBC1 domain family, member 20                                                    |
| 5  | C14orf126    | 47                 | 0        | 14  | D-tyrosyl-tRNA deacylase 2 (putative)                                            |
| 6  | RPF2         | 49                 | 0        | 6   | ribosome production factor 2 homolog (S. cerevisiae)                             |
| 7  | SNRNP27      | 50                 | 0        | 2   | small nuclear ribonucleoprotein 27kDa (U4/U6.U5)                                 |
| 8  | TLE4         | 55                 | 0        | 9   | transducin-like enhancer of split 4 (E(sp1) homolog, Drosophila)                 |
| 9  | CENPW        | 62                 | 0        | 6   | centromere protein W                                                             |
| 10 | PIK3R3       | 65                 | 0        | 1   | phosphoinositide-3-kinase, regulatory subunit 3 (gamma)                          |
| 11 | RPS7         | 77                 | 0        | 2   | ribosomal protein S7                                                             |
| 12 | PLA2G16      | 83                 | 0        | 11  | phospholipase A2, group XVI                                                      |
| 13 | HNRNPA3      | 86                 | 0        | 2   | heterogeneous nuclear ribonucleoprotein A3                                       |
| 14 | XRCC2        | 96                 | 0        | 7   | X-ray repair complementing defective repair in Chinese hamster cells 2           |
| 15 | GOLPH3       | 100                | 0        | 5   | golgi phosphoprotein 3 (coat-protein)                                            |
| 16 | CHORDC1      | 110                | 0        | 11  | cysteine and histidine-rich domain (CHORD) containing 1                          |
| 17 | GFPT1        | 120                | 0        | 2   | glutamine-fructose-6-phosphate transaminase 1                                    |
| 18 | CISD1        | 129                | 0        | 10  | CDGSH iron sulfur domain 1                                                       |
| 19 | TRA2A        | 133                | 0        | 7   | transformer 2 alpha homolog (Drosophila)                                         |
| 20 | MKRN2        | 134                | 0        | 3   | makorin ring finger protein 2                                                    |
| 21 | CAD          | 144                | 0        | 2   | carbamoyl-phosphate synthetase 2, aspartate transcarbamylase, and dihydrootetase |
| 22 | SPG11        | 157                | 0        | 15  | spastic paraplegia 11 (autosomal recessive)                                      |
| 23 | RNF34        | 177                | 0        | 12  | ring finger protein 34, E3 ubiquitin protein ligase                              |
| 24 | SERINC3      | 188                | 0        | 20  | serine incorporator 3                                                            |
| 25 | C3orf38      | 192                | 0        | 3   | chromosome 3 open reading frame 38                                               |
| 26 | MYC          | 203                | 0        | 8   | v-myc myelocytomatosis viral oncogene homolog (avian)                            |
| 27 | RPE          | 204                | 0        | 2   | ribulose-5-phosphate-3-epimerase                                                 |
| 28 | SNRPG        | 210                | 0        | 2   | small nuclear ribonucleoprotein polypeptide G                                    |
| 29 | HSF2         | 216                | 0        | 6   | heat shock transcription factor 2                                                |
| 30 | DSCR3        | 219                | 0        | 21  | Down syndrome critical region gene 3                                             |
| 31 | DEPTOR       | 226                | 0        | 8   | DEP domain containing MTOR-interacting protein                                   |
| 32 | SLC30A6      | 238                | 0        | 2   | solute carrier family 30 (zinc transporter), member 6                            |
| 33 | SHP19        | 239                | 0        | 5   | signal recognition particle 19kDa                                                |
| 34 | YEATS4       | 252                | 3.4e-313 | 12  | YEATS domain containing 4                                                        |
| 35 | PYGL         | 259                | 4.6e-296 | 14  | phosphorylase, glycogen, liver                                                   |
| 36 | POLR3H       | 264                | 1.6e-280 | 22  | polymerase (RNA) III (DNA directed) polypeptide H (22.9kD)                       |
| 37 | FAM65B       | 274                | 2.1e-220 | 6   | family with sequence similarity 65, member B                                     |
| 38 | PVALB        | 277                | 5.5e-217 | 22  | parvalbumin                                                                      |
| 39 | FAM98A       | 293                | 1.5e-180 | 2   | family with sequence similarity 98, member A                                     |
| 40 | RAB8A        | 294                | 1.7e-176 | 19  | RAB8A, member RAS oncogene family                                                |
| 41 | TTC17        | 301                | 2.3e-163 | 11  | tetratricopeptide repeat domain 17                                               |
| 42 | CWC25        | 308                | 4.1e-150 | 17  | CWC25 spliceosome-associated protein homolog (S. cerevisiae)                     |
| 43 | EIF4EBP2     | 309                | 4.2e-146 | 10  | eukaryotic translation initiation factor 4E binding protein 2                    |
| 44 | TXNL1        | 311                | 4.2e-146 | 18  | thioredoxin-like 1                                                               |
| 45 | SPAG9        | 319                | 3.6e-132 | 17  | sperm associated antigen 9                                                       |
| 46 | STXBP3       | 324                | 3.5e-125 | 1   | syntaxin binding protein 3                                                       |
| 47 | CLIC4        | 331                | 1.1e-119 | 1   | chloride intracellular channel 4                                                 |
| 48 | PSMC6        | 334                | 4.3e-117 | 14  | proteasome (prosome, macropain) 26S subunit, ATPase, 6                           |
| 49 | ITM2B        | 336                | 2.7e-114 | 13  | integral membrane protein 2B                                                     |
| 50 | SFT2D2       | 343                | 2.3e-104 | 1   | SFT2 domain containing 2                                                         |
| 51 | CWF19L1      | 348                | 2.6e-95  | 10  | CWF19-like 1, cell cycle control (S. pombe)                                      |
| 52 | HMGN1        | 350                | 3.2e-93  | 21  | high mobility group nucleosome binding domain 1                                  |
| 53 | CYB5R1       | 351                | 1.6e-92  | 1   | cytochrome b5 reductase 1                                                        |
| 54 | LOC153684    | 355                | 1.6e-87  | 5   | uncharacterized LOC153684                                                        |
| 55 | NKX2-2       | 361                | 1.2e-75  | 20  | NK2 homeobox 2                                                                   |
| 56 | NDUFA11      | 363                | 1.3e-74  | 19  | NADH dehydrogenase (ubiquinone) 1 alpha subcomplex, 11, 14.7kDa                  |
| 57 | CDKN2C       | 366                | 3.7e-72  | 1   | cyclin-dependent kinase inhibitor 2C (p18, inhibits CDK4)                        |
| 58 | LOC387647    | 370                | 9.4e-67  | 10  | patched domain containing 3 pseudogene 1                                         |
| 59 | MSH6         | 372                | 1.3e-64  | 2   | mutS homolog 6 (E. coli)                                                         |
| 60 | NEMF         | 388                | 9.1e-48  | 14  | nuclear export mediator factor                                                   |
| 61 | PAPOLA       | 398                | 1.1e-44  | 14  | poly(A) polymerase alpha                                                         |
| 62 | C8orf38      | 399                | 2.3e-44  | 8   | NADH dehydrogenase (ubiquinone) complex I, assembly factor 6                     |
| 63 | CCDC138      | 406                | 1.2e-40  | 2   | coiled-coil domain containing 138                                                |
| 64 | KIAA1429     | 407                | 1.8e-40  | 8   | KIAA1429                                                                         |
| 65 | HDAC2        | 408                | 2e-39    | 6   | histone deacetylase 2                                                            |
| 66 | TNFSF9       | 411                | 5.7e-39  | 19  | tumor necrosis factor (ligand) superfamily, member 9                             |
| 67 | CLTA         | 421                | 1.9e-32  | 9   | clathrin, light chain A                                                          |
| 68 | MAPK12       | 424                | 1.2e-31  | 22  | mitogen-activated protein kinase 12                                              |
| 69 | SCFD1        | 428                | 4.8e-29  | 14  | sec1 family domain containing 1                                                  |
| 70 | PARP11       | 440                | 7.1e-24  | 12  | poly (ADP-ribose) polymerase family, member 11                                   |
| 71 | UGGT1        | 442                | 5.7e-23  | 2   | UDP-glucose glycoprotein glucosyltransferase 1                                   |
| 72 | MICALCL      | 443                | 1.5e-22  | 11  | MICAL C-terminal like                                                            |
| 73 | MPHOSPH8     | 457                | 1.5e-15  | 13  | M-phase phosphoprotein 8                                                         |
| 74 | SUZ12P       | 466                | 1.1e-13  | 17  | suppressor of zeste 12 homolog pseudogene 1                                      |
| 75 | EPHX2        | 468                | 2.2e-13  | 8   | epoxide hydrolase 2, cytoplasmic                                                 |
| 76 | MAT2B        | 490                | 1.1e-08  | 5   | methionine adenosyltransferase II, beta                                          |
| 77 | C6orf223     | 491                | 2.7e-08  | 6   | chromosome 6 open reading frame 223                                              |
| 78 | RARS         | 492                | 2e-07    | 5   | arginyl-tRNA synthetase                                                          |
| 79 | BCAP29       | 496                | 6.4e-07  | 7   | B-cell receptor-associated protein 29                                            |
| 80 | BBS5         | 502                | 3.8e-06  | 2   | Bardet-Biedl syndrome 5                                                          |
| 81 | DONSON       | 510                | 2.1e-05  | 21  | downstream neighbor of SON                                                       |
| 82 | TEX14        | 543                | 0.00083  | 17  | testis expressed 14                                                              |
| 83 | FAM21C       | 547                | 0.00097  | 10  | family with sequence similarity 21, member C                                     |
| 84 | L3MBTL2      | 560                | 0.0014   | 22  | l(3)mbt-like 2 (Drosophila)                                                      |
| 85 | CLCN3        | 562                | 0.0017   | 4   | chloride channel, voltage-sensitive 3                                            |
| 86 | HFE          | 575                | 0.004    | 6   | hemochromatosis                                                                  |
| 87 | SRSF1        | 586                | 0.0072   | 17  | serine/arginine-rich splicing factor 1                                           |
| 88 | CCNB1        | 587                | 0.0073   | 5   | cyclin B1                                                                        |
| 89 | SLC30A1      | 588                | 0.0074   | 1   | solute carrier family 30 (zinc transporter), member 1                            |
| 90 | POLR3B       | 591                | 0.0085   | 12  | polymerase (RNA) III (DNA directed) polypeptide B                                |
| 91 | C9orf40      | 594                | 0.0089   | 9   | chromosome 9 open reading frame 40                                               |
| 92 | NFU1         | 595                | 0.0093   | 2   | NFU1 iron-sulfur cluster scaffold homolog (S. cerevisiae)                        |
| 93 | KPNB1        | 597                | 0.0094   | 17  | karyopherin (importin) beta 1                                                    |
| 94 | BLOC1S1      | 607                | 0.012    | 12  | biogenesis of lysosomal organelles complex-1, subunit 1                          |
| 95 | LOC100132215 | 614                | 0.014    | 2   | uncharacterized LOC100132215                                                     |

Supplementary Table 3: Prognostic signature, cluster 'hyper 2' (top 95 genes)

|    | Symbol    | Rank in prog. sig. | q-val    | Chr | Info                                                                              |
|----|-----------|--------------------|----------|-----|-----------------------------------------------------------------------------------|
| 1  | ZNF727    | 12                 | 0        | 7   | zinc finger protein 727                                                           |
| 2  | PDE1B     | 19                 | 0        | 12  | phosphodiesterase 1B, calmodulin-dependent                                        |
| 3  | BK250D10  | 23                 | 0        |     |                                                                                   |
| 4  | ANKRD13B  | 34                 | 0        | 17  | ankyrin repeat domain 13B                                                         |
| 5  | IL17REL   | 38                 | 0        | 22  | interleukin 17 receptor E-like                                                    |
| 6  | GPC5      | 40                 | 0        | 13  | glypican 5                                                                        |
| 7  | ZNF300P1  | 59                 | 0        | 5   | zinc finger protein 300 pseudogene 1                                              |
| 8  | EGR2      | 66                 | 0        | 10  | early growth response 2                                                           |
| 9  | GPXMB     | 70                 | 0        | 7   | glycoprotein (transmembrane) nmb                                                  |
| 10 | B4GALNT1  | 71                 | 0        | 12  | beta-1,4-N-acetyl-galactosaminyl transferase 1                                    |
| 11 | KCNJ9     | 88                 | 0        | 1   | potassium inwardly-rectifying channel, subfamily J, member 9                      |
| 12 | LTF       | 102                | 0        | 3   | lactotransferrin                                                                  |
| 13 | FSCN2     | 105                | 0        | 17  | fascin homolog 2, actin-bundling protein, retinal (Strongylocentrotus purpuratus) |
| 14 | GPRIN1    | 112                | 0        | 5   | G protein regulated inducer of neurite outgrowth 1                                |
| 15 | ZDHC22    | 116                | 0        | 14  | zinc finger, DHHC-type containing 22                                              |
| 16 | RGR       | 128                | 0        | 10  | retinal G protein coupled receptor                                                |
| 17 | UFD1L     | 130                | 0        | 22  | ubiquitin fusion degradation 1 like (yeast)                                       |
| 18 | AQP2      | 147                | 0        | 12  | aquaporin 2 (collecting duct)                                                     |
| 19 | LPAR5     | 156                | 0        | 12  | lysophosphatidic acid receptor 5                                                  |
| 20 | ECEL1     | 163                | 0        | 2   | endothelin converting enzyme-like 1                                               |
| 21 | CSF1R     | 202                | 0        | 5   | colony stimulating factor 1 receptor                                              |
| 22 | RALGAPA2  | 211                | 0        | 20  | Ral GTPase activating protein, alpha subunit 2 (catalytic)                        |
| 23 | KHDRBS2   | 245                | 0        | 6   | KH domain containing, RNA binding, signal transduction associated 2               |
| 24 | TMEM26    | 258                | 2.2e-304 | 10  | transmembrane protein 26                                                          |
| 25 | RQCD1     | 263                | 4.3e-287 | 2   | RCD1 required for cell differentiation1 homolog (S. pombe)                        |
| 26 | ADAMTSL3  | 269                | 5.3e-239 | 15  | ADAMTS-like 3                                                                     |
| 27 | KCNS1     | 290                | 1.7e-188 | 20  | potassium voltage-gated channel, delayed-rectifier, subfamily S, member 1         |
| 28 | HOXA9     | 297                | 1.4e-167 | 7   | homeobox A9                                                                       |
| 29 | LECT1     | 317                | 4.7e-139 | 13  | leukocyte cell derived chemotaxin 1                                               |
| 30 | EPHX3     | 330                | 5.5e-121 | 19  | epoxide hydrolase 3                                                               |
| 31 | C12orf56  | 360                | 1.5e-77  | 12  | chromosome 12 open reading frame 56                                               |
| 32 | CDO1      | 368                | 2.5e-69  | 5   | cysteine dioxygenase, type I                                                      |
| 33 | LOC644172 | 382                | 8.9e-57  | 17  | mitogen-activated protein kinase 8 interacting protein 1 pseudogene               |
| 34 | FAM198B   | 397                | 1.1e-44  | 4   | family with sequence similarity 198, member B                                     |
| 35 | UBE2QL1   | 427                | 8.3e-30  | 5   | ubiquitin-conjugating enzyme E2Q family-like 1                                    |
| 36 | NPY       | 441                | 1.5e-23  | 7   | neuropeptide Y                                                                    |
| 37 | KLB       | 503                | 5e-06    | 4   | klotho beta                                                                       |
| 38 | PIF1      | 516                | 8e-05    | 15  | PIF1 5'-to-3' DNA helicase homolog (S. cerevisiae)                                |
| 39 | SLC10A4   | 527                | 0.00038  | 4   | solute carrier family 10 (sodium/bile acid cotransporter family), member 4        |
| 40 | ANXA6     | 558                | 0.0013   | 5   | annexin A6                                                                        |
| 41 | LINC00271 | 565                | 0.0022   | 6   | long intergenic non-protein coding RNA 271                                        |
| 42 | TSPAN32   | 625                | 0.017    | 11  | tetraspanin 32                                                                    |
| 43 | TRPM8     | 647                | 0.031    | 2   | transient receptor potential cation channel, subfamily M, member 8                |
| 44 | SPHKAP    | 656                | 0.034    | 2   | SPHK1 interactor, AKAP domain containing                                          |
| 45 | RCAN2     | 676                | 0.048    | 6   | regulator of calcineurin 2                                                        |

Supplementary Table 4: Prognostic signature, cluster 'hypo 1'

|    | Symbol   | Rank in prog. sig. | q-val    | Chr | Info                                                                               |
|----|----------|--------------------|----------|-----|------------------------------------------------------------------------------------|
| 1  | NOX4     | 74                 | 0        | 11  | NADPH oxidase 4                                                                    |
| 2  | CD74     | 84                 | 0        | 5   | CD74 molecule, major histocompatibility complex, class II invariant chain          |
| 3  | DYRK1A   | 167                | 0        | 21  | dual-specificity tyrosine-(Y)-phosphorylation regulated kinase 1A                  |
| 4  | CPE      | 180                | 0        | 4   | carboxypeptidase E                                                                 |
| 5  | MT1F     | 267                | 1.7e-241 | 16  | metallothionein 1F                                                                 |
| 6  | SPEF2    | 276                | 4.9e-219 | 5   | sperm flagellar 2                                                                  |
| 7  | NFKBIZ   | 287                | 1e-191   | 3   | nuclear factor of kappa light polypeptide gene enhancer in B-cells inhibitor, zeta |
| 8  | CDR2     | 295                | 3.1e-171 | 16  | cerebellar degeneration-related protein 2, 62kDa                                   |
| 9  | GIN5     | 302                | 3.8e-162 | 20  | GIN5 complex subunit 1 (Psf1 homolog)                                              |
| 10 | COPZ1    | 316                | 9.9e-141 | 12  | coatamer protein complex, subunit zeta 1                                           |
| 11 | CCDC110  | 338                | 5e-112   | 4   | coiled-coil domain containing 110                                                  |
| 12 | NEK9     | 393                | 1.2e-45  | 14  | NIMA-related kinase 9                                                              |
| 13 | TMEM170B | 417                | 1.1e-33  | 6   | transmembrane protein 170B                                                         |
| 14 | NRIP3    | 448                | 8e-21    | 11  | nuclear receptor interacting protein 3                                             |
| 15 | NAAA     | 464                | 3.4e-14  | 4   | N-acyl ethanolamine acid amidase                                                   |
| 16 | PPAT     | 501                | 2e-06    | 4   | phosphoribosyl pyrophosphate amidotransferase                                      |
| 17 | VWDE     | 579                | 0.005    | 7   | von Willebrand factor D and EGF domains                                            |
| 18 | SLC16A11 | 642                | 0.027    | 17  | solute carrier family 16, member 11 (monocarboxylic acid transporter 11)           |
| 19 | JHDM1D   | 652                | 0.033    | 7   | jumonji C domain containing histone demethylase 1 homolog D (S. cerevisiae)        |

Supplementary Table 5: Prognostic signature, cluster 'hypo 2'

| CGI region | OC prog signat.           | Gene body mean            | Cluster Hyper1            | Cluster Hyper2           | Cluster Hyper3           | Cluster Hyper4             |
|------------|---------------------------|---------------------------|---------------------------|--------------------------|--------------------------|----------------------------|
| Island     | -2.93%<br>( $p < 0.001$ ) | 3.68%<br>( $p < 0.001$ )  | 1.52%<br>( $p = 0.48$ )   | 7.06%<br>( $p < 0.001$ ) | 7.07%<br>( $p = 0.03$ )  | -2.08%<br>( $p = 0.628$ )  |
| Shore      | -1.09%<br>( $p < 0.001$ ) | 0.915%<br>( $p = 0.166$ ) | -4.62%<br>( $p = 0.016$ ) | 7.47%<br>( $p < 0.001$ ) | 1.18%<br>( $p = 0.614$ ) | 0.0419%<br>( $p = 0.834$ ) |
| Shelf      | 1.26%<br>( $p < 0.001$ )  | 1.19%<br>( $p = 0.01$ )   | 2.95%<br>( $p = 0.778$ )  | 5.07%<br>( $p < 0.001$ ) | 2.84%<br>( $p = 0.09$ )  | 4.2%<br>( $p = 0.15$ )     |

*Supplementary Table 6: CpG island enrichment of prognostic signature CpGs.*

Relative CpG island enrichment of CpGs mapping to gene bodies was assessed for all genes genome-wide, for the genes of the prognostic signature, and for the genes of the four prognostic clusters. Permutation-test  $p$ -values were obtained by randomly sampling the same number of probes annotated to the gene bodies of the genes under consideration, from all probes genome-wide, and repeating this 1000 times.

| OC prog signat.          | Gene body mean           | Cluster Hyper1           | Cluster Hyper2           | Cluster Hyper3           | Cluster Hyper4           |
|--------------------------|--------------------------|--------------------------|--------------------------|--------------------------|--------------------------|
| 4.61%<br>( $p < 0.001$ ) | 6.11%<br>( $p < 0.001$ ) | -1.14%<br>( $p = 0.57$ ) | -4.75%<br>( $p = 0.01$ ) | 15.8%<br>( $p < 0.001$ ) | 4.34%<br>( $p = 0.234$ ) |

*Supplementary Table 7: Enhancer region enrichment of prognostic signature CpGs.*

Relative enhancer-region enrichment of CpGs mapping to gene bodies was assessed for all genes genome-wide, for the genes of the prognostic signature, and for the genes of the four prognostic clusters. Permutation-test  $p$ -values were obtained by randomly sampling the same number of probes annotated to the gene bodies of the genes under consideration, from all probes genome-wide, and repeating this 1000 times.
